# Supplementary material for: Prognostic Impact of Array-based Genomic Profiles in Esophageal Squamous Cell Cancer
Source: BMC Cancer. 2008 Apr 11;8:98. doi: 10.1186/1471-2407-8-98 (PMC2374796; doi:10.1186/1471-2407-8-98)
Supplement: Additional file 1 — Clinicopathologic variables of tumors and survival of patients of the sample set. Table listing the clinicopathologic variables of tumors and survival of patients of the sample set analyzed in this study. [file 1471-2407-8-98-S1.xls]

## Sheet: Sheet1
	Additional File 1 - Clinicopathologic variables of tumors and survival of patients of the sample set
			Number	Tumor‡					Nodes‡			Metastasis‡			Differentiation			Survival¥
				T1	T2	T3	T4		N0	N1		M0	M1		High	Low		Death	Alive
	Stage† I		3 (10%)	3	0	0	0		3	0		0			2	1		0	3
	Stage II		9 (30%)	2	2	5	0		6	3		9	0		3	6		5	4
	Stage III		7 (23%)	0	0	7	0		0	7		7	0		5	2		6	1
	Stage IV		11 (36%)	1	1	7	2		0	11		1	10		5	4		6	5
	Total		30	6	3	19	2		9	21		17	10		15	13		17	13
	† Stage according to the International Union Against Cancer
	‡ Tumor, Nodes and Metastasis according to UICC TNM classification, 2002. For Tumor, pT is considered.
	¥ Survival in months
