# Supplementary material for: Prognostic Impact of Array-based Genomic Profiles in Esophageal Squamous Cell Cancer
Source: BMC Cancer. 2008 Apr 11;8:98. doi: 10.1186/1471-2407-8-98 (PMC2374796; doi:10.1186/1471-2407-8-98)
Supplement: Additional file 5 — Chi2 test significant regions associated with positive lymph nodes (P < 0.05). Table listing the regions of aberrations that showed a significant statistical (P < 0.05) association with positive lymph nodes. Given are cytoband, start reporter, end reporter, size (Mbp) and the frequency across patients with positive lymph nodes and patients with negative lymph nodes. P-values were computed using Chi2 test. [file 1471-2407-8-98-S5.xls]

## Sheet: Sheet1
	Additional File 5 - Chi2 test significant regions associated with positive lymph nodes (P<0.05)
	Cytoband		Start reporter		End reporter		Size Mbp		Frequency in LN+ (n=21)	Frequency in LN- (n=9)
	2p16.2		RP11-1114A19		RP11-434E19		5.56436
	2q37.1		RP11-707E3		RP11-695D7		24.092		14	0
	6q21		RP11-715L3		RP11-97O15		11.6237		0	11
	6q26		RP11-609K7		RP11-159J7		17.0956		14	0
	7p22.3		CTD-2245C5		RP11-174C14		0.698825		47	22
	7p21.1		RP11-669C22		RP11-112E16		3.00826		28	0
	8p23.2		RP11-803A20		RP11-500M18		0.644419		34	41
	10q25.1		RP11-165P9		RP11-588L21		11.0457		0	0
	11p15.4		RP11-211E17		RP11-391D21		0.812094		0	11
	11p14.1		RP11-597N16		RP11-580A22		3.26394		0	11
	11p11.2		RP11-798D15		RP11-152F3		4.78679		0	14
	16q12.2		RP11-593L10		RP11-343H19		5.53696		0	14
	16q23.1		RP11-730M21		RP11-777J3		8.29455		0	10
	16q24.3		RP11-674G19		RP11-202G16		8.86996		22	0
	17p13.3		CTD-2326F1		RP11-202G16		0.169988		23	11
	17p12		RP11-687M21		RP11-788I14		1.88502		14	0
	17q24.3		RP11-449C4		RP11-648M17		6.9122		14	11
	17q25.3		RP11-806H10		RP11-353N14		7.55646		22	11
	18q11.2		RP11-17J14		RP11-369D11		2.1125		14	0
	18q21.2		RP11-805M18		RP11-92O13		5.31635		11	28
	19q13.42		RP13-898P22		RP11-700B5		6.02705		0	11
	LN+, Positive Lymph Nodes; LN-, Negative Lymph Nodes
