# Supplementary material for: Prognostic Impact of Array-based Genomic Profiles in Esophageal Squamous Cell Cancer
Source: BMC Cancer. 2008 Apr 11;8:98. doi: 10.1186/1471-2407-8-98 (PMC2374796; doi:10.1186/1471-2407-8-98)
Supplement: Additional file 6 — Chi2 test significant regions associated with metastasis at diagnosis (P < 0.05). Table listing the regions of aberrations that showed a significant statistical (P < 0.05) association with metastasis at diagnosis. Given are cytoband, start reporter, end reporter, size (Mbp) and the frequency across patients with metastasis at diagnosis and patients without metastasis at diagnosis. P-values were computed using Chi2 test. [file 1471-2407-8-98-S6.xls]

## Sheet: Sheet1
	Additional File 6 - Chi2 test significant regions associated with metastasis at diagnosis (P<0.05)
	Cytoband	Start reporter		End reporter	Size (Mbp)	Frequency in M+ Tumors (n=10)	Frequency in M- Tumors (n=17)
	1q32.3-q42.12	RP11-122M14		RP11-638F12	22.1636	14	0
	1q44	RP11-314P17		RP11-378I20	24.5203	0	11
	2p25.2	CTD-2379H9		RP11-158I13	0.512432	14	0
	2p24.3	RP11-674F13		RP11-158I13	2.79147	47	22
	3q21.2	RP11-729M4		RP11-507B9	15.041	28	0
	5q35.3	RP11-767A16		RP11-663F6	17.9354	34	41
	6q26	RP11-168A5		RP11-159J7	17.0956	0	0
	7p22.3	CTD-2245C5		RP11-174C14	0.698825	0	11
	8q21.3	RP11-379N22		RP11-353D8	9.00802	0	11
	9q33.2-9q33.3	RP11-102I1		RP11-706C8	12.4212	0	14
	10p12.31	RP11-619J12		CTD-2325L10	2.10272	0	14
	10q24.1	RP11-304C14		RP11-153G4	9.86935	0	10
	12p12.3	RP11-777C15		CTD-2042L15	1.85529	22	0
	12p12.1	RP11-437K19		RP11-479M4	2.69151	23	11
	12q21.33	RP11-796E2		RP11-644H3	9.28387	14	0
	13q14.2	RP11-413A14		RP11-111B10	5.27927	14	11
	15q11.2	RP11-720B15		RP11-336F16	2.85856	22	11
	15q26.3	RP11-168G16		RP11-95F11	10.0261	14	0
	16p13.3	RP11-344L6		RP11-617O21	0.424945	11	28
	M+, Metastais at diagnosis; M-, No Metastasis at diagnosis
